# Supplementary material for: Integrative analyses of mendelian randomization and bioinformatics reveal casual relationship and genetic links between COVID-19 and knee osteoarthritis
Source: PubMed Central journal article supplement — BMC Med Genomics. 2025 Jan 2;18:2. doi: 10.1186/s12920-024-02074-4 (PMC11697936; doi:10.1186/s12920-024-02074-4), 2025-01-02
Supplement: 12920_2024_2074_MOESM1_ESM.pdf [file 12920_2024_2074_MOESM1_ESM.pdf]

## Additional file

**Table S1. Data sources**

| Disease  | Data Sources | ID           | Platform | Samples used            | Tissue              | Experiment Type |
|----------|--------------|--------------|----------|-------------------------|---------------------|-----------------|
| KOA      | ArrayExpress | E-MTAB-12184 |          | 6 cases vs. 6 controls  | articular cartilage | RNA-Seq         |
| COVID-19 | GEO          | GSE180226    | GPL6480  | 19 cases vs. 3 controls | Lung                | Array           |
| URTIs    | GEO          | GSE197143    | GPL24676 | 6 cases vs. 3 controls  | Lung                | RNA-Seq         |
| URTIs    | GEO          | GSE206606    | GPL18573 | 3 cases vs. 3 controls  | Lung                | RNA-Seq         |
| KOA      | GEO          | GSE220243    | GPL18573 | 6 cases vs. 6 controls  | articular cartilage | scRNA-Seq       |

**Table S2. Sensitivity analysis**

| Exposure | Outcome | Analysis Type        | Method   | Q     | P-value |
|----------|---------|----------------------|----------|-------|---------|
| COVID-19 | KOA     | sensitivity analysis | MR Egger | 20.87 | 0.467   |
| COVID-19 | KOA     | sensitivity analysis | IVW      | 20.93 | 0.525   |

*IVW: Inverse variance weighted*

**Table S3. Multiplicity test**

| Exposure | Outcome | Analysis Type     | Egger_intercept              | P-value |
|----------|---------|-------------------|------------------------------|---------|
| COVID-19 | KOA     | Multiplicity test | -0.002 (95%CI: -0.018-0.014) | 0.811   |

**Table S4. Mendelian randomization results for additional validation**

| Exposure ID          | Exposure | Sample sizes | OutcomeID                    | Outcome                           | Sample sizes | Method                    | Nsnp | Beta  | p-value |
|----------------------|----------|--------------|------------------------------|-----------------------------------|--------------|---------------------------|------|-------|---------|
| ebi-a-GCS<br>T011071 | COVID-19 | 158878<br>3  | ebi-a-GCST<br>005812         | Osteoarthritis of the hip or knee | 32970        | Inverse variance weighted | 28   | 0.161 | 0.044   |
| ebi-a-GCS<br>T011073 | COVID-19 | 168376<br>8  | ukb-a-563                    | Gonarthrosi s [arthrosis of knee] | 337199       | Inverse variance weighted | 22   | 0.004 | 0.007   |
| ebi-a-GCS<br>T011073 | COVID-19 | 168376<br>8  | ukb-d-KNE<br>E_ARTHR<br>OSIS | Gonarthrosi s [arthrosis of knee] | 361194       | Inverse variance weighted | 22   | 0.004 | 0.01    |
| ebi-a-GCS<br>T011073 | COVID-19 | 168376<br>8  | ebi-a-GCST<br>007092         | Osteoarthritis of the hip or knee | 417596       | Inverse variance weighted | 23   | 0.061 | 0.039   |
| ebi-a-GCS<br>T011074 | COVID-19 | 134870<br>1  | ukb-a-563                    | Gonarthrosi s [arthrosis of knee] | 337199       | Inverse variance weighted | 16   | 0.003 | 0.041   |
| ebi-a-GCS<br>T011080 | COVID-19 | 16645        | ukb-a-563                    | Gonarthrosi s [arthrosis of knee] | 337199       | Inverse variance weighted | 12   | 0.001 | 0.03    |
| ebi-a-GCS<br>T011085 | COVID-19 | 10365        | ebi-a-GCST<br>007090         | Knee osteoarthritis               | 403124       | Inverse variance weighted | 11   | 0.033 | 0.025   |

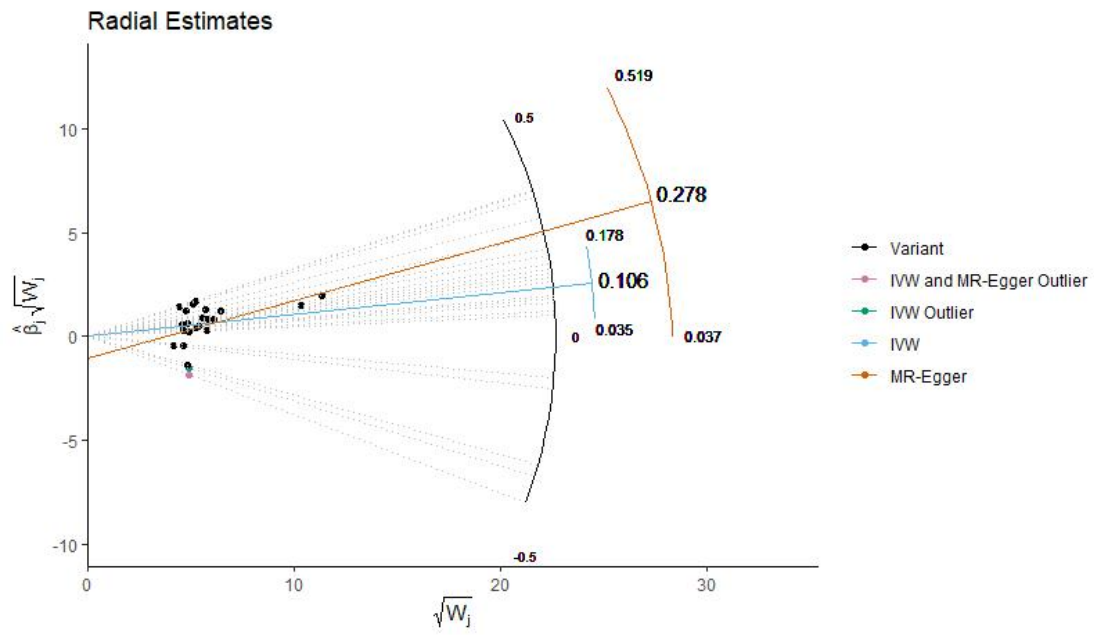

Figure S1. Radial-MR method tests outliers of SNPs. The SNPs "rs140434804" and "rs7786241" were identified as outliers and excluded from the subsequent MR analysis. R package RadialMR (<https://github.com/WSpiller/RadialMR/>) was used for the analysis.

**Table S5. Mendelian randomization results for COVID19 and KOA risk factors**

| Exposure | Exposure ID          | Outcome                           | OutcomeID                   | Methods                         | Nsnp | Beta        | p-value | PFDR       |
|----------|----------------------|-----------------------------------|-----------------------------|---------------------------------|------|-------------|---------|------------|
| COVID-19 | ebi-a-GC<br>ST011073 | Body mass index<br>(BMI)          | ukb-b-19953                 | Inverse<br>variance<br>weighted | 23   | 0.033<br>3  | 0.001   | 0.00<br>6  |
| COVID-19 | ebi-a-GC<br>ST011073 | Osteoporosis                      | finn-b-M13_OST<br>EOPOROSIS | Inverse<br>variance<br>weighted | 21   | -0.12<br>56 | 0.285   | 0.42<br>75 |
| COVID-19 | ebi-a-GC<br>ST011073 | Pain in joint                     | ukb-b-13019                 | Inverse<br>variance<br>weighted | 5    | 0.000<br>6  | 0.457   | 0.45<br>7  |
| COVID-19 | ebi-a-GC<br>ST011073 | muscle or soft<br>tissue injuries | ukb-b-7603                  | Inverse<br>variance<br>weighted | 12   | 0.000<br>8  | 0.401   | 0.45<br>7  |
| COVID-19 | ebi-a-GC<br>ST011073 | Type 1 diabetes                   | finn-b-E4_DM1               | Inverse<br>variance<br>weighted | 21   | 0.133       | 0.169   | 0.33<br>8  |
| COVID-19 | ebi-a-GC<br>ST011073 | Type 2 diabetes                   | finn-b-E4_DM2               | Inverse<br>variance<br>weighted | 21   | 0.101<br>8  | 0.162   | 0.33<br>8  |

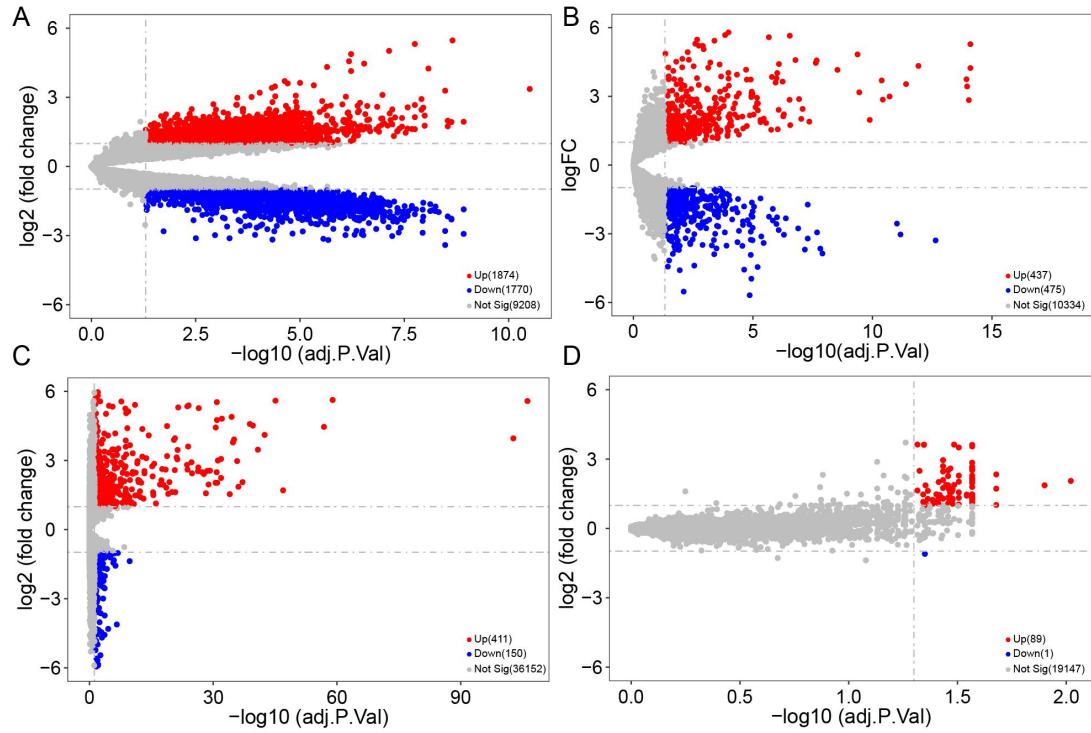

Figure S2. Identification of differential expressed genes. **A** Volcano map of DEGs in COVID-19; blue indicates downregulated DEGs and red upregulated DEGs. **B** Volcano map of DEGs in KOA; blue indicates downregulated DEGs and red upregulated DEGs. **C- D** Volcano map of DEGs in URTI; blue indicates downregulated DEGs and red upregulated DEGs

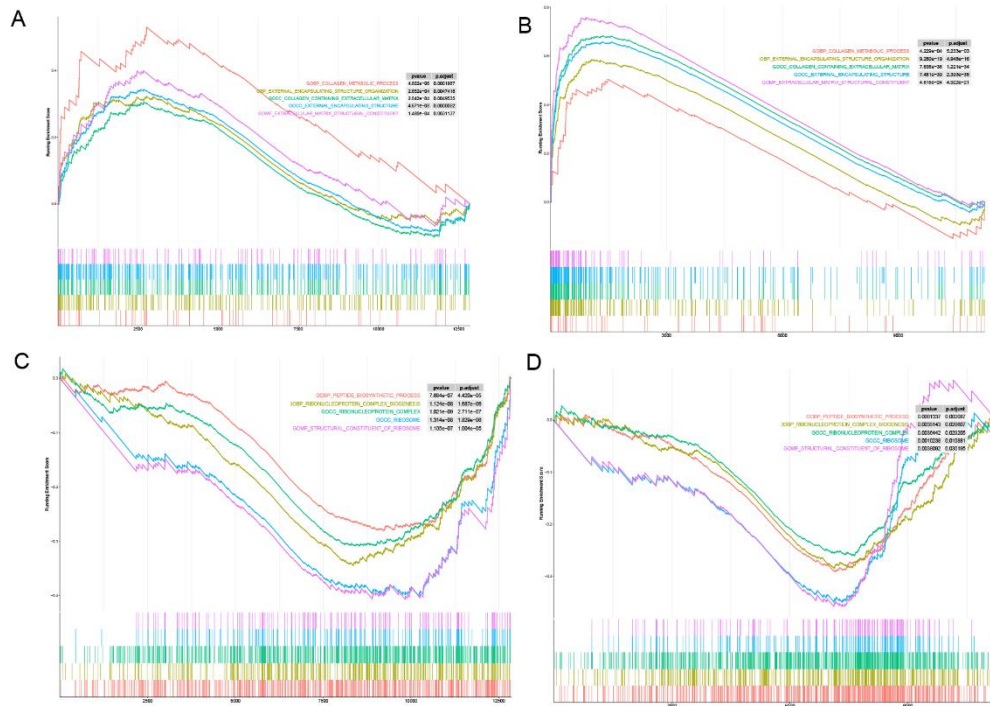

Figure S3. Gene set enrichment analysis. **A-B** Five common positive enrichment pathways of COVID-19 and KOA (collagen metabolic process; external encapsulating structure organization; collagen containing extracellular matrix; external encapsulating structure; extracellular matrix structural constituent). **C-D** Five common negative enrichment pathways of COVID-19 and KOA (peptide biosynthetic process; ribonucleoprotein complex biogenesis; ribonucleoprotein complex; ribosome structural constituent of ribosome)

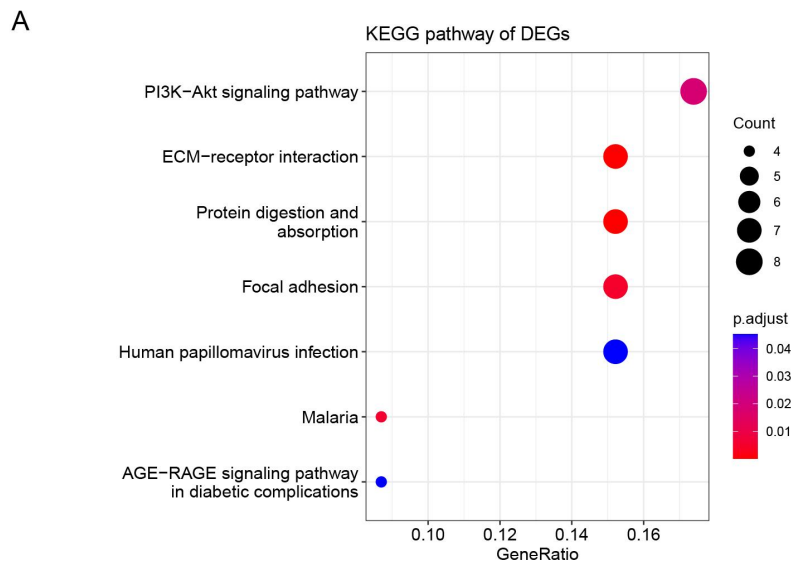

Figure S4. KEGG enrichment analysis of 91 DEGs

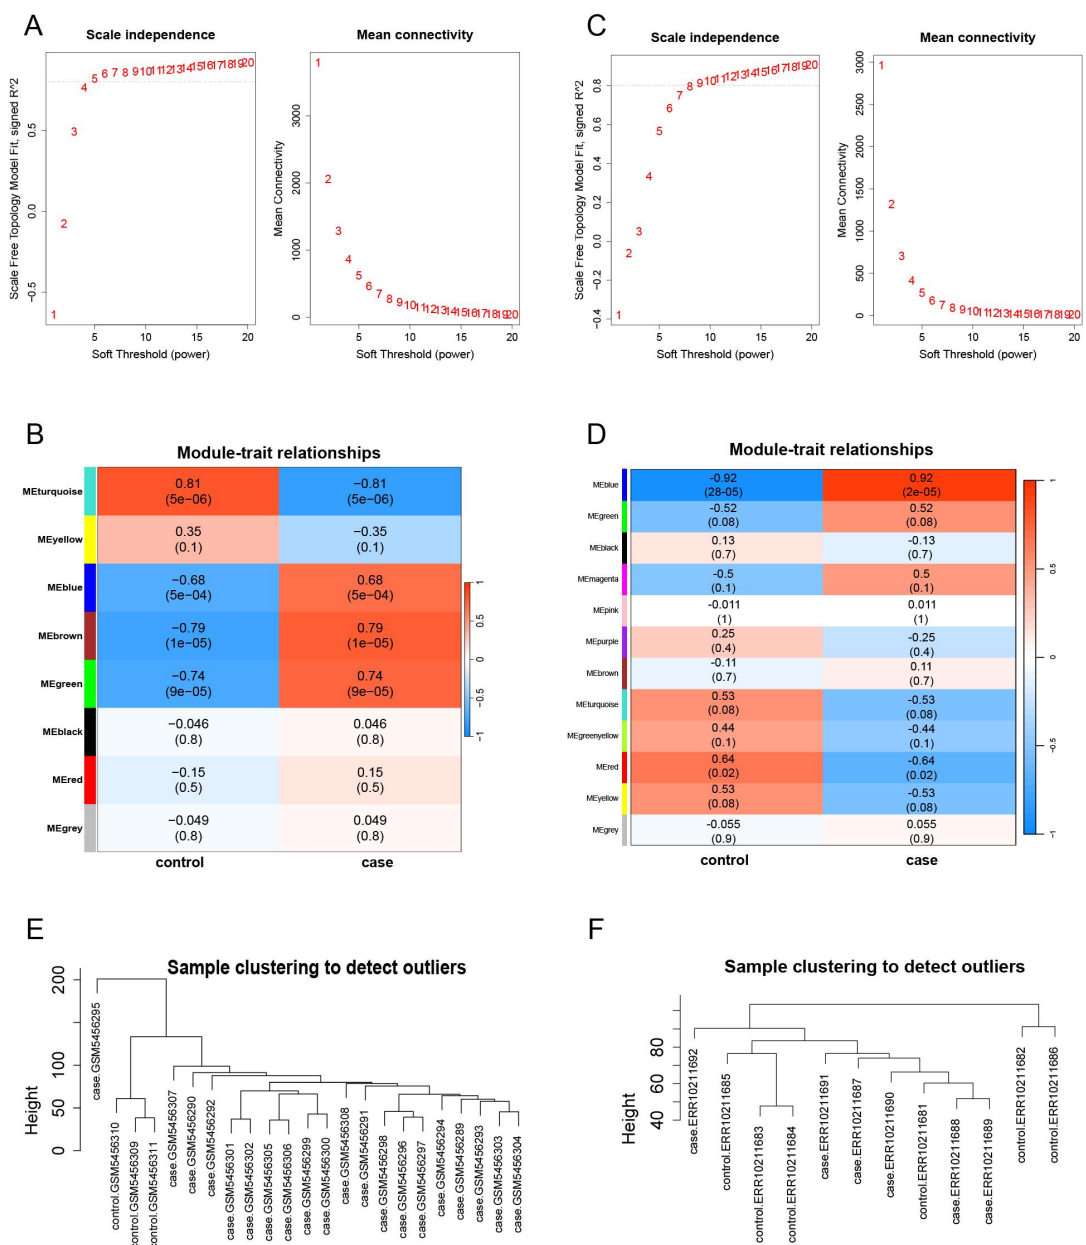

Figure S5. WGCNA. **A, C** Scaleless index and average connectivity of individual soft thresholds for COVID-19 and KOA, **A** for COVID-19 and **C** for KOA. **B, D** Heatmap of the correlation between module characteristic genes and COVID-19 and KOA, **B** for COVID-19 and **D** for KOA; blue indicates a negative correlation, while red a positive correlation. **E, F** Cluster tree of COVID-19 and KOA samples, **E** for COVID-19 and **F** for KOA. One sample (case.GSM5456295) was eliminated as an outlier from the COVID-19 samples.

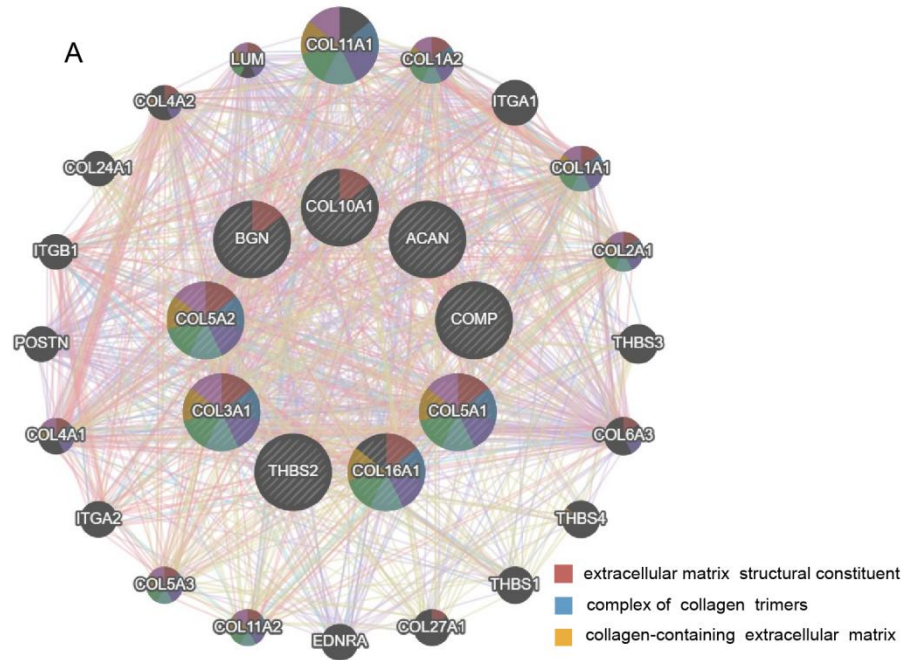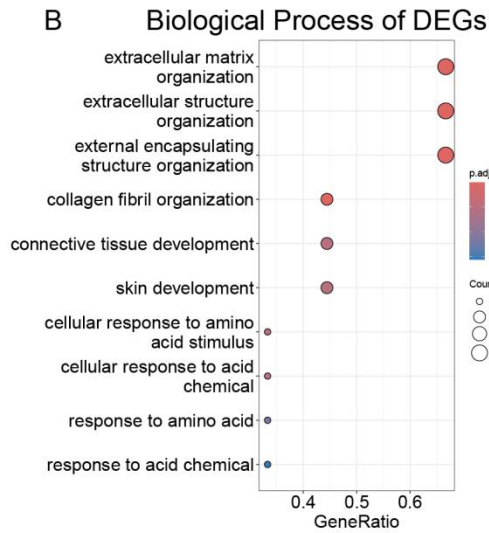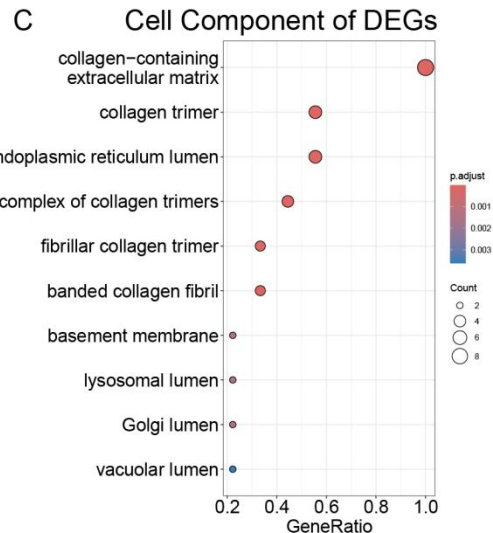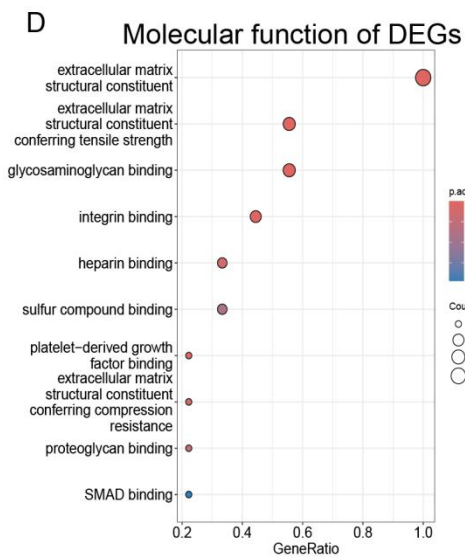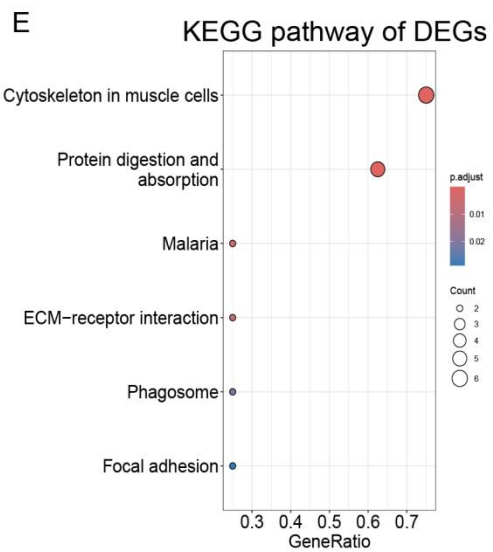



Figure S6. **A** GeneMANIA diagram shows the coexpression interactions between the nine identified shared core genes and their neighbouring genes. Colour codes indicate functions shared by genes. **B-E** GO and KEGG enrichment analyses of the nine core genes

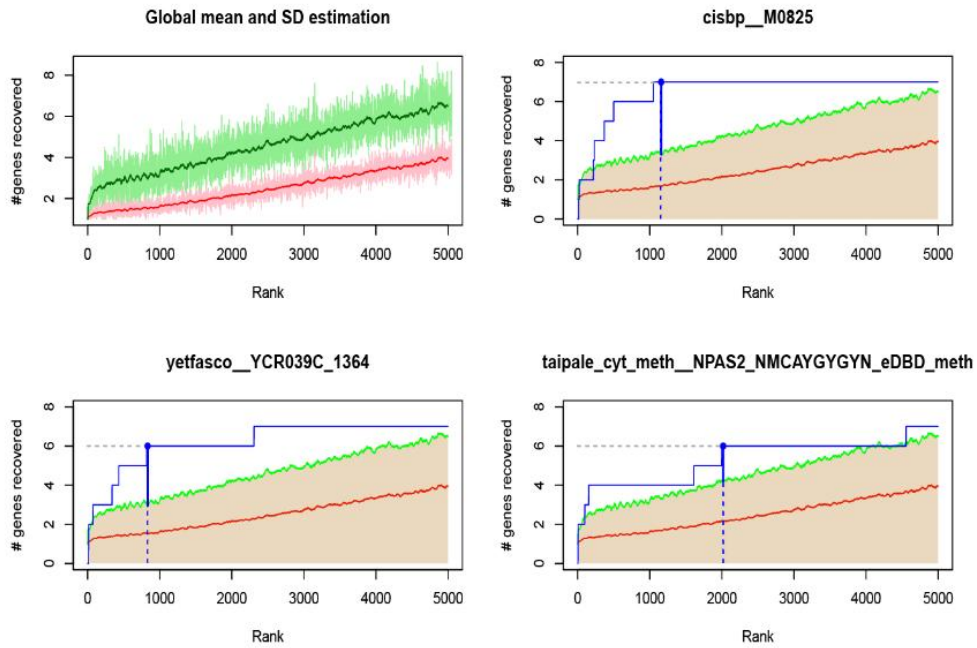

Figure S7. Three motifs exhibiting the highest AUC values. The recovery curve of each motif was averaged and represented by the red line, while the mean plus standard deviation was depicted by the green line. The recovery curve of the current motif is illustrated by the blue line. The maximum enrichment level was determined as the point of maximum distance between the current motif and the green curve (mean + standard deviation)

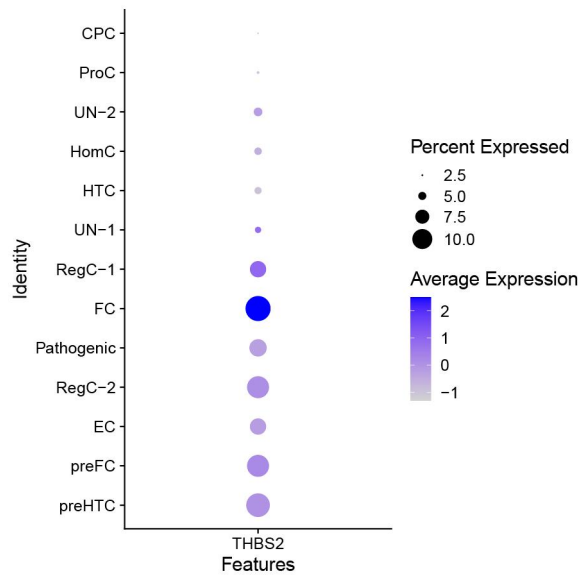

Figure S8. Bubble plot depicting the expression of THBS2 in different cellular subtypes of cartilage tissue

**Table S6. The intersection of 91 genes between WGCNA module genes and common DEGs**

| 91 genes list |         |         |          |           |
|---------------|---------|---------|----------|-----------|
| SRPX2         | DNAJC22 | DAPK2   | THBS3    | MAOA      |
| ANGPTL2       | BCL2    | ALDH6A1 | IQSEC1   | RABGGTB   |
| COL3A1        | LYNX1   | CCNG2   | NPAS3    | CITED2    |
| COL5A2        | CRLF1   | NUP153  | SLC22A17 | RAB11FIP1 |
| SMOC1         | GFRA2   | ZSCAN18 | SSC5D    | ENO2      |
| CILP2         | SHISA4  | GLUL    | DIO2     | GPX3      |
| BGN           | FOXA3   | SETD6   | CKAP4    | WSB1      |
| COMP          | AHDC1   | RELA    | ARPC5    | EFCAB2    |
| COL5A1        | BAALC   | ECHS1   | SERPINH1 | PRDM16    |
| SLC35B4       | THBS1   | UFM1    | SPON2    | RBP4      |
| COL10A1       | LMF1    | STXBP1  | RPL24    | CDC37L1   |
| NPTN          | ENHO    | FKBP15  | MXI1     | COL1A1    |
| MXRA8         | GPX8    | ASL     | ZC3H7A   | LTBP3     |
| COL6A1        | GALNT10 | SDC4    | UBA2     | ATOH8     |
| SMO           | SOX8    | PTPN1   | CCNI     | GPM6B     |
| COL16A1       | NDRG1   | DCXR    | FBXO21   | ECI2      |
| ACAN          | NSA2    | ASCC1   | CDK2AP2  | UAP1      |
| THBS2         | LETMD1  | ZBTB16  | CCNB1IP1 | BTG2      |
| METTL6        |         |         |          |           |
